# Supplementary material
Source: PubMed Central journal article supplement (PMC3842237)
Supplement: NIHMS529045-supplement-Figure_Table4.pdf [file NIHMS529045-supplement-Figure_Table4.pdf]

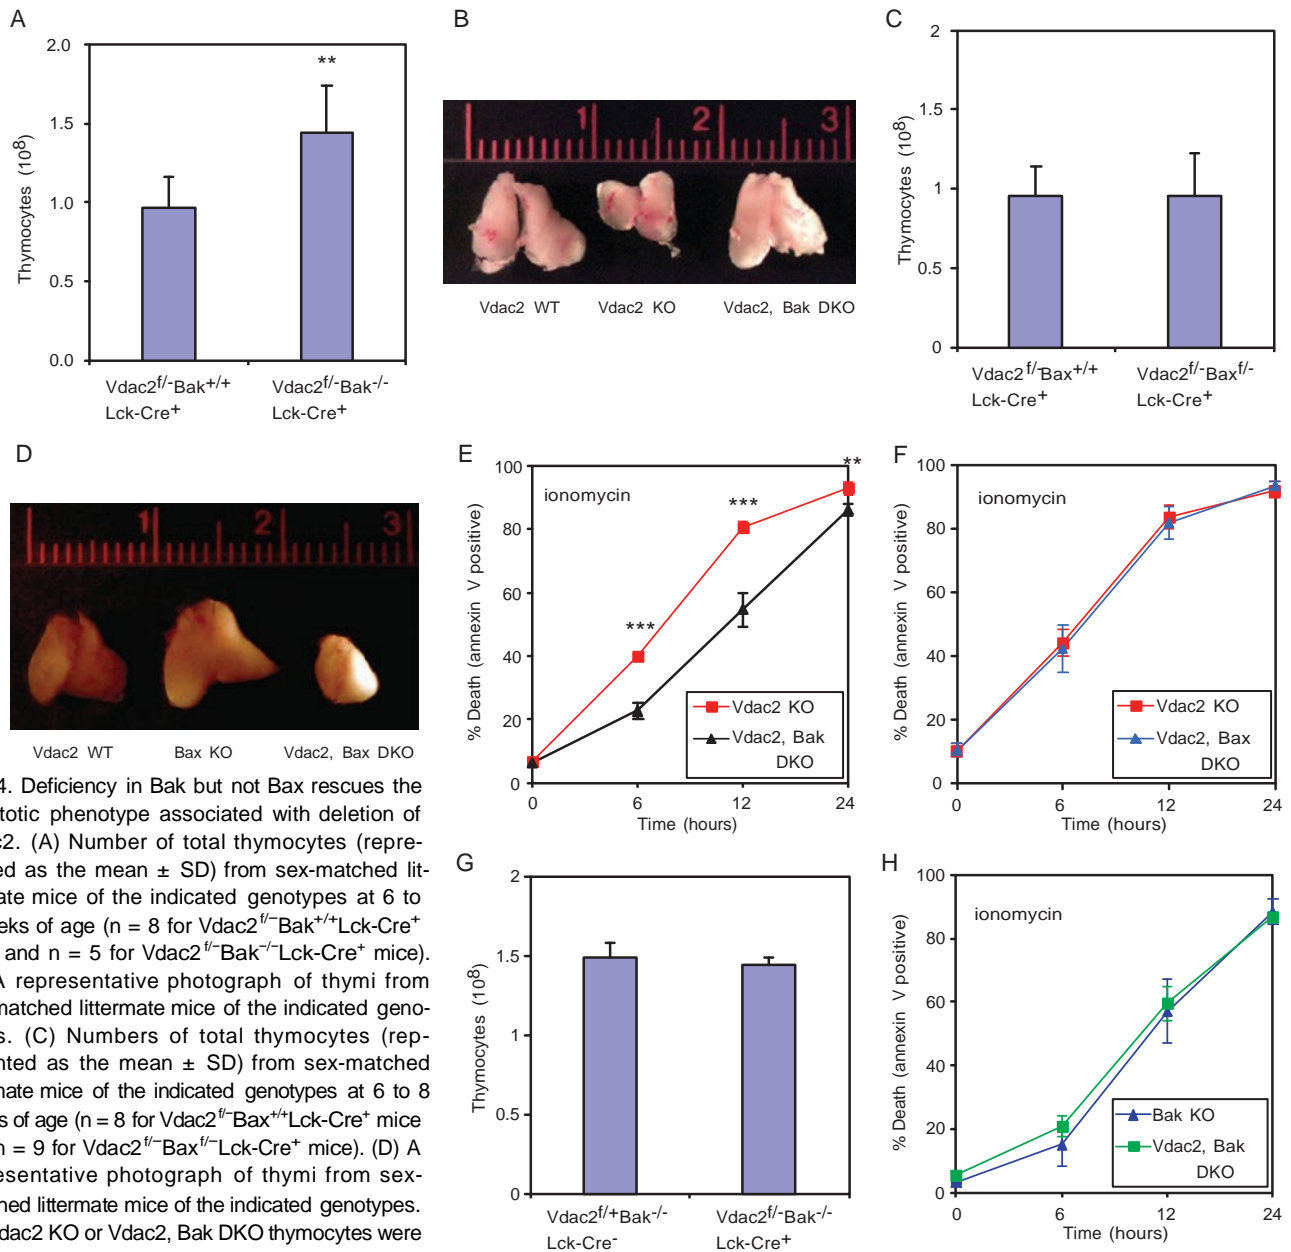

Fig. 4. Deficiency in Bak but not Bax rescues the apoptotic phenotype associated with deletion of Vdac2. (A) Number of total thymocytes (represented as the mean  $\pm$  SD) from sex-matched littermate mice of the indicated genotypes at 6 to 8 weeks of age ( $n = 8$  for Vdac2<sup>f/f</sup>-Bak<sup>+/+</sup>-Lck-Cre<sup>+</sup> mice and  $n = 5$  for Vdac2<sup>f/f</sup>-Bak<sup>-/-</sup>-Lck-Cre<sup>+</sup> mice). (B) A representative photograph of thymi from sex-matched littermate mice of the indicated genotypes. (C) Numbers of total thymocytes (represented as the mean  $\pm$  SD) from sex-matched littermate mice of the indicated genotypes at 6 to 8 weeks of age ( $n = 8$  for Vdac2<sup>f/f</sup>-Bax<sup>+/+</sup>-Lck-Cre<sup>+</sup> mice and  $n = 9$  for Vdac2<sup>f/f</sup>-Bax<sup>f/f</sup>-Lck-Cre<sup>+</sup> mice). (D) A representative photograph of thymi from sex-matched littermate mice of the indicated genotypes. (E) Vdac2 KO or Vdac2, Bak DKO thymocytes were treated with ionomycin and cell death was quantified by staining with annexin V at the indicated times. Data shown are the mean percentage of annexin V-positive cells  $\pm$  SD from  $n = 3$  experiments. (F) Vdac2 KO or Vdac2, Bax DKO thymocytes were treated with ionomycin and cell death was quantified by staining with annexin V at the indicated times. Data shown are the mean percentage of annexin V-positive cells  $\pm$  SD from  $n = 3$  experiments. (G) Number of total thymocytes (mean  $\pm$  SD)

from sex-matched littermate mice of the indicated genotypes at 6 to 8 weeks of age ( $n = 5$  for Vdac2<sup>f/+</sup>Bak<sup>-/-</sup>-Lck-Cre<sup>-</sup> mice and  $n = 4$  for Vdac2<sup>f/f</sup>-Bak<sup>-/-</sup>-Lck-Cre<sup>+</sup> mice). (H) Bak KO or Vdac2, Bak DKO thymocytes were treated with ionomycin and cell death was quantified by staining with annexin V at the indicated times. Data shown are the mean  $\pm$  SD. from three independent experiments. \* $P < 0.05$ ; \*\* $P < 0.01$ ; \*\*\* $P < 0.001$ .
